# Supplementary material
Source: PubMed Central journal article supplement (PMC8756362)
Supplement: jamasurg-e216898-s001.pdf [file jamasurg-e216898-s001.pdf]

## Supplementary Online Content

Howard R, Chao GF, Yang J, et al. Medication use for obesity-related comorbidities after sleeve gastrectomy or gastric bypass. *JAMA Surg*. Published online January 12, 2022. doi:10.1001/jamasurg.2021.6898

**eTable 1.** Diagnosis Codes Used to Identify Study Cohorts

**eTable 2.** Diabetes, Hypertension, and Hyperlipidemia Medications Used to Identify Study Cohorts

**eTable 3.** Covariate Balance Using Instrumental Variable for Cohort of Patients With Diabetes Medication Use and Diagnosis at the Time of Surgery

**eTable 4.** Covariate Balance Using Instrumental Variable for Cohort of Patients With Hypertension Medication Use and Diagnosis at the Time of Surgery

**eTable 5.** Covariate Balance Using Instrumental Variable for Cohort of Patients With Hyperlipidemia Medication Use and Diagnosis at the Time of Surgery

**eTable 6.** Baseline Characteristics of Patients Who Discontinued All Diabetes, Hypertension, and Hyperlipidemia Medications After Surgery and Among Whom the Incidence of Medication Restart Was Calculated

**eTable 7.** Adjusted Hazard Ratios Without Use of the Instrumental Variable for Discontinuation of Diabetes, Hypertension, and Hyperlipidemia Medications at 1, 3, and 5 Years After Gastric Bypass Compared to Sleeve Gastrectomy

**eTable 8.** Adjusted Hazard Ratios Without Use of the Instrumental Variable for Restarting Diabetes, Hypertension, and Hyperlipidemia Medications at 1, 3, and 5 Years After Medication Discontinuation Following Gastric Bypass Compared to Sleeve Gastrectomy

This supplementary material has been provided by the authors to give readers additional information about their work.

**eTable 1.** Diagnosis Codes Used to Identify Study Cohorts

|                |                                                                                                                                                                                                                                                     |
|----------------|-----------------------------------------------------------------------------------------------------------------------------------------------------------------------------------------------------------------------------------------------------|
| Diabetes       | <b>ICD-9:</b> 250.0-250.33, 648.0, 648.01, 648.02, 648.03, 648.04, 249.0-249.31, 249.40-249.91, 250.40-250.93<br><b>ICD-10:</b> E08.0-E13.9, O24.011-O24.93, E08.21-E13.8                                                                           |
| Hypertension   | <b>ICD-9:</b> 401.0, 401.1, 401.9, 437.2, 642.00-642.04<br><b>ICD-10:</b> I10.0, O10.011-O10.93, I16.0, I16.1, I16.9, I67.4, I11.0, I11.9, I15.2, I15.8, I15.9, I10.11-I11.9, I13.0, I13.2, I13.10, I13.11, I12.9, I15.0, I15.1, I12.0, I16.1-I16.9 |
| Hyperlipidemia | <b>ICD-9:</b> 272.0, 272.1, 272.2, 272.3, 272.4<br><b>ICD-10:</b> E78.0, E78.1, E78.2, E78.3, E78.4, E78.5                                                                                                                                          |

**eTable 2.** Diabetes, Hypertension, and Hyperlipidemia Medications Used to Identify Study Cohorts

|                            |                                                                                                                                                                                                                                                                                                                                                                                                                                                                                                                                                                                                                                                                                                                                                                                                                                                                                                                                                                                                                                                                                                                                                                                                                                                                                                                                                                                                                                                                                                                                                                                                                                                                                                                                                                                                                                                                                                                                                                                                                                                                                                                                                                                                                                                |
|----------------------------|------------------------------------------------------------------------------------------------------------------------------------------------------------------------------------------------------------------------------------------------------------------------------------------------------------------------------------------------------------------------------------------------------------------------------------------------------------------------------------------------------------------------------------------------------------------------------------------------------------------------------------------------------------------------------------------------------------------------------------------------------------------------------------------------------------------------------------------------------------------------------------------------------------------------------------------------------------------------------------------------------------------------------------------------------------------------------------------------------------------------------------------------------------------------------------------------------------------------------------------------------------------------------------------------------------------------------------------------------------------------------------------------------------------------------------------------------------------------------------------------------------------------------------------------------------------------------------------------------------------------------------------------------------------------------------------------------------------------------------------------------------------------------------------------------------------------------------------------------------------------------------------------------------------------------------------------------------------------------------------------------------------------------------------------------------------------------------------------------------------------------------------------------------------------------------------------------------------------------------------------|
| <p><b>Diabetes</b></p>     | <p>METFORMIN HCL; INSULIN GLARGINE,HUM.REC.ANLOG; INSULIN ASPART; GLIPIZIDE; INSULIN DETEMIR; PEN NEEDLE, DIABETIC; GLIMEPIRIDE; INSULIN LISPRO; NEEDLES, INSULIN DISPOSABLE; LIRAGLUTIDE; SITAGLIPTIN PHOSPHATE; PIOGLITAZONE HCL; INSULIN REGULAR, HUMAN; SYRINGE &amp; NEEDLE,INSULIN,1 ML; SYRINGE AND NEEDLE,INSULIN,1ML; CANAGLIFLOZIN; GLYBURIDE; SITAGLIPTIN PHOS/METFORMIN HCL; LINAGLIPTIN; INSULIN NPH HUM/REG INSULIN HM; INSULN ASP PRT/INSULIN ASPART; EXENATIDE MICROSPHERES; INSULIN NPH HUMAN ISOPHANE; DULAGLUTIDE; EXENATIDE; SYRING W-NDL,DISP,INSUL,0.5ML; SYRING W-NDL,DISP,INSUL,0.5 ML; HUM INSULIN NPH/REG INSULIN HM; SYRINGE-NEEDLE,INSULIN,0.5 ML; NPH, HUMAN INSULIN ISOPHANE; INSULIN DEGLUDEC; INSULIN NPL/INSULIN LISPRO; GLYBURIDE/METFORMIN HCL; INSULIN LISPRO PROTAMIN/LISPRO; INSULIN ASPART PROT/INSULN ASP; DAPAGLIFLOZIN PROPANEDIOL; EMPAGLIFLOZIN; PIOGLITAZONE HCL/METFORMIN HCL; INSULIN GLULISINE; INSULIN ASPART PROTAM &amp; ASPART; SYRING W-NDL,DISP,INSUL,0.3 ML; REPAGLINIDE; SYRING W-NDL,DISP,INSUL,0.3ML; NATEGLINIDE; SYRING-NEEDL,DISP,INSUL,0.3 ML; ACARBOSE; SAXAGLIPTIN HCL/METFORMIN HCL; LINAGLIPTIN/METFORMIN HCL; PRAMLINTIDE ACETATE; GLIPIZIDE/METFORMIN HCL; ALBIGLUTIDE; CANAGLIFLOZIN/METFORMIN HCL; SUB-Q INSULIN DEVICE, 40 UNIT; GLYBURIDE,MICRONIZED; SYR W-NDL,INS 0.3 ML HALF MARK; SUB-Q INSULIN DEVICE, 30 UNIT; NEEDLES, INSULIN DISP., SAFETY; PEN NEEDLE, DIABETIC, SAFETY; DAPAGLIFLOZIN/METFORMIN HCL; SYRGE-NDL,INS 0.3 ML HALF MARK; SUB-Q INSULIN DEVICE, 20 UNIT; PIOGLITAZONE HCL/GLIMEPIRIDE; PEN NEEDLE,DUAL SAFETY,DIABETC; EMPAGLIFLOZIN/LINAGLIPTIN; PEN NEEDLE, DIABETIC,DISP UNIT; ALOGLIPTIN BENZ/METFORMIN HCL; ALOGLIPTIN BENZ/PIOGLITAZONE; ALOGLIPTIN BENZOATE; ROSIGLITAZONE MALEATE; SYRINGE,INSUL U-500,NDL,0.5ML; MIGLITOL; EMPAGLIFLOZIN/METFORMIN HCL; ROSIGLITAZONE/METFORMIN HCL; SYRINGE,SAFETY WITH NEEDLE,1ML; SYRINGE W-NEEDLE,DISPOSAB,3 ML; SYRINGE W-O NEEDL,INSULIN,1 ML; INSULIN DEGLUDEC/LIRAGLUTIDE; SYRINGE W-NDL, DISP., INSULIN; SYR,NDL,INSULIN,1ML-SHARPS BIN; INSULIN GLARGINE/LIXISENATIDE; SYRINGE,NEEDLE,INSULN,SAFE,1ML; SYRINGE NDL,INSUL U-500,0.5ML; SYRING W-O NDL,DISP,INSUL, 1ML; NEEDLES, DISPOSABLE</p> |
| <p><b>Hypertension</b></p> | <p>LISINAPRIL; FUROSEMIDE; AMLODIPINE BESYLATE; METOPROLOL TARTRATE; LOSARTAN POTASSIUM; HYDROCHLOROTHIAZIDE; METOPROLOL SUCCINATE; CARVEDILOL; ESOMEPRAZOLE MAGNESIUM; ATENOLOL; SPIRONOLACTONE; LISINAPRIL/HYDROCHLOROTHIAZIDE; DILTIAZEM HCL; LOSARTAN/HYDROCHLOROTHIAZIDE; VALSARTAN; HYDRALAZINE HCL; VERAPAMIL HCL; ENALAPRIL MALEATE; VALSARTAN/HYDROCHLOROTHIAZIDE; BENAZEPRIL HCL; NIFEDIPINE; NEBIVOLOL HCL; CHLORTHALIDONE; RAMIPRIL; OLMESARTAN MEDOXOMIL; LABETALOL HCL; AMLODIPINE BESYLATE/BENAZEPRIL; QUINAPRIL HCL; IRBESARTAN; OLMESARTAN/HYDROCHLOROTHIAZIDE; BISOPROLOL FUMARATE; ATENOLOL/CHLORTHALIDONE; TELMISARTAN; AMLODIPINE/VALSARTAN; BISOPROLOL FUMARATE/HCTZ; BENAZEPRIL/HYDROCHLOROTHIAZIDE; FOSINOPRIL SODIUM; SPIRONOLACT/HYDROCHLOROTHIAZID; FELODIPINE; TELMISARTAN/HYDROCHLOROTHIAZID; IRBESARTAN/HYDROCHLOROTHIAZIDE; ENALAPRIL/HYDROCHLOROTHIAZIDE; CARVEDILOL PHOSPHATE; OLMESARTAN/AMLODIPIN/HCTHIAZID; AMLODIPINE BES/OLMESARTAN MED; EPLERENONE; AMLODIPINE/VALSARTAN/HCTHIAZID; CAPTOPRIL; ALISKIREN HEMIFUMARATE; AMILORIDE HCL; SACUBITRIL/VALSARTAN; BISOPROLOL/HYDROCHLOROTHIAZIDE; BISOPROLOL/HYDROCHLOROTHIAZIDE; METOPROLOL/HYDROCHLOROTHIAZIDE; AMLODIPINE/ATORVASTATIN; TRANDOLAPRIL; QUINAPRIL/HYDROCHLOROTHIAZIDE; ACEBUTOLOL HCL; AMILORIDE/HYDROCHLOROTHIAZIDE; AZILSARTAN MED/CHLORTHALIDONE; AZILSARTAN MEDOXOMIL; AMLODIPINE BESYLATE/VALSARTAN; MOEXIPRIL HCL; PINDOLOL;</p>                                                                                                                                                                                                                                                                                                                                                                                                                                                                                                                                                                                                                                                                                                                                                                                                       |

|                       |                                                                                                                                                                                                                                                                                                                                                                                                                                                                                                                                                                                                                                                                                                                 |
|-----------------------|-----------------------------------------------------------------------------------------------------------------------------------------------------------------------------------------------------------------------------------------------------------------------------------------------------------------------------------------------------------------------------------------------------------------------------------------------------------------------------------------------------------------------------------------------------------------------------------------------------------------------------------------------------------------------------------------------------------------|
|                       | <p>NISOLDIPINE; ISOSORB DINIT/HYDRALAZINE HCL; MOEXIPRIL/HYDROCHLOROTHIAZIDE; TRIAMTERENE; BETAXOLOL HCL; OLMESARTAN MED/AMLODIPINE/HCTZ; AMLODIPINE/VALSARTAN/HCTZ; CANDESARTAN/HYDROCHLOROTHIAZID; ISOSORBIBE DINIT/HYDRALAZINE; PERINDOPRIL ERBUMINE; ALISKIREN/VALSARTAN; ALISKIREN/HYDROCHLOROTHIAZIDE; CHLOROTHIAZIDE; CAPTOPRIL/HYDROCHLOROTHIAZIDE; FOSINOPRIL/HYDROCHLOROTHIAZIDE; TIMOLOL; NICARDIPINE HCL; ISRADIPINE; TELMISARTAN/AMLODIPINE; TRANDOLAPRIL/VERAPAMIL HCL; PROPRANOLOL/HYDROCHLOROTHIAZID; TIMOLOL MALEATE/PF; EPROSARTAN MESYLATE; PHENOXYBENZAMINE HCL; METOPROLOL SUCCINATE/HCTZ; ISOSORBIDE DINIT/HYDRALAZINE; ALISKIREN/AMLODIPINE BESYLATE; PENBUTOLOL SULFATE; NIMODIPINE</p> |
| <b>Hyperlipidemia</b> | <p>ATORVASTATIN CALCIUM; SIMVASTATIN; PRAVASTATIN SODIUM; ROSUVASTATIN CALCIUM; LOVASTATIN; FENOFIBRATE NANOCRYSTALLIZED; EZETIMIBE; FENOFIBRATE; GEMFIBROZIL; FENOFIBRATE, MICRONIZED; FENOFIBRIC ACID (CHOLINE); COLESEVELAM HCL; EZETIMIBE/SIMVASTATIN; COLESTIPOL HCL; ICOSAPENT ETHYL; PITAVASTATIN CALCIUM; EVOLOCUMAB; ALIROCUMAB; FLUVASTATIN SODIUM; NIACIN/SIMVASTATIN; NIACIN/LOVASTATIN; FENOFIBRIC ACID; SITAGLIPTIN/SIMVASTATIN; EZETIMIBE/ATORVASTATIN CALCIUM</p>                                                                                                                                                                                                                               |

**eTable 3.** Covariate Balance Using Instrumental Variable for Cohort of Patients With Diabetes Medication Use and Diagnosis at the Time of Surgery

| Characteristic                         | Actual Treatment |                  |       | Prior Year Sleeve Utilization Rate |                                |       |
|----------------------------------------|------------------|------------------|-------|------------------------------------|--------------------------------|-------|
|                                        | Bypass (N=13779) | Sleeve (N=16809) | SD    | 4 <sup>th</sup> qtile (N=7848)     | 1 <sup>st</sup> qtile (N=7438) | SD    |
| Sleeve gastrectomy                     | 0                | 100              | N/A   | 67.43                              | 43.82                          | 48.93 |
| Age (years)                            |                  |                  |       |                                    |                                |       |
| ≤55                                    | 44.00            | 39.21            | 9.73  | 41.28                              | 41.73                          | 0.91  |
| 55-65                                  | 27.3             | 26.27            | 2.34  | 26.55                              | 27.17                          | 1.39  |
| 66-75                                  | 28.2             | 33.61            | 11.73 | 31.56                              | 30.48                          | 2.34  |
| >75                                    | 0.5              | 0.92             | 4.95  | 0.60                               | 0.62                           | 0.25  |
| Female                                 | 72.65            | 70.09            | 5.66  | 70.73                              | 72.45                          | 3.82  |
| White Race                             | 75.89            | 74.65            | 2.88  | 73.55                              | 78.81                          | 12.38 |
| Comorbidities                          |                  |                  |       |                                    |                                |       |
| Acquired immune deficiency syndrome    | 0.08             | 0.15             | 2.19  | 0.15                               | 0.07                           | 2.58  |
| Chronic blood loss anemia              | 0.22             | 0.14             | 1.92  | 0.18                               | 0.17                           | 0.09  |
| Chronic pulmonary disease              | 29.17            | 28.75            | 0.92  | 28.12                              | 29.55                          | 3.16  |
| Coagulopathy                           | 1.03             | 0.86             | 1.73  | 0.76                               | 1.05                           | 3.00  |
| Congestive heart failure               | 8.03             | 9.44             | 4.99  | 8.92                               | 9.16                           | 0.82  |
| Deficiency Anemias                     | 7.15             | 7.05             | 0.38  | 7.4                                | 6.64                           | 2.98  |
| Depression                             | 28.7             | 24.94            | 8.49  | 25.15                              | 29.69                          | 10.17 |
| Diabetes with chronic complications    | N/A              |                  |       | N/A                                |                                |       |
| Diabetes without chronic complications | N/A              |                  |       | N/A                                |                                |       |
| Fluid and electrolyte disorders        | 7.5              | 6.48             | 3.97  | 6.88                               | 7.11                           | 0.91  |
| Hypertension                           | 84.06            | 84.16            | 0.29  | 84.21                              | 84.44                          | 0.64  |
| Hypothyroidism                         | 17.8             | 18.37            | 1.48  | 17.33                              | 19.00                          | 4.33  |
| Liver disease                          | 16.92            | 15.14            | 4.84  | 13.39                              | 15.18                          | 5.11  |
| Lymphoma                               | 0.06             | 0.12             | 2.21  | 0.15                               | 0.03                           | 4.21  |
| Other neurological disorders           | 5.18             | 4.93             | 1.14  | 4.83                               | 6.31                           | 6.44  |
| Paralysis                              | 0.53             | 0.63             | 1.33  | 0.57                               | 0.56                           | 0.12  |
| Peripheral vascular disease            | 2.18             | 2.12             | 0.41  | 2.01                               | 2.19                           | 1.24  |
| Psychoses                              | 7.56             | 6.25             | 5.19  | 6.40                               | 7.70                           | 5.11  |
| Pulmonary circulation disease          | 1.42             | 0.93             | 4.53  | 1.16                               | 1.29                           | 1.19  |
| Renal failure                          | 8.69             | 9.7              | 3.52  | 8.89                               | 9.87                           | 3.34  |
| Rheumatoid arthritis/collagen vas      | 3.48             | 3.56             | 0.43  | 3.59                               | 3.55                           | 0.24  |
| Solid tumor w/out metastasis           | 0.27             | 0.29             | 0.43  | 0.17                               | 0.38                           | 4.06  |
| Malnutrition                           | 0.49             | 0.27             | 3.57  | 0.43                               | 0.36                           | 1.12  |
| Valvular disease                       | 1.79             | 2.01             | 1.60  | 1.98                               | 1.87                           | 0.77  |

**eTable 4.** Covariate Balance Using Instrumental Variable for Cohort of Patients With Hypertension Medication Use and Diagnosis at the Time of Surgery

| Characteristic                         | Actual Treatment |                  |       | Prior Year Sleeve Utilization Rate |                                 |       |
|----------------------------------------|------------------|------------------|-------|------------------------------------|---------------------------------|-------|
|                                        | Bypass (N=20955) | Sleeve (N=31126) | SD    | 4 <sup>th</sup> qtile (N=12665)    | 1 <sup>st</sup> qtile (N=12532) | SD    |
| Sleeve gastrectomy                     | 0                | 100              | N/A   | 71.61                              | 48.72                           | 48.07 |
| Age (years)                            |                  |                  |       |                                    |                                 |       |
| ≤55                                    | 43.70            | 38.25            | 11.10 | 40.68                              | 40.65                           | 0.07  |
| 55-65                                  | 26.53            | 25.29            | 2.82  | 25.86                              | 25.71                           | 0.34  |
| 66-75                                  | 29.20            | 35.39            | 13.27 | 32.65                              | 32.94                           | 0.61  |
| >75                                    | 0.58             | 1.07             | 5.45  | 0.80                               | 0.70                            | 0.01  |
| Female                                 | 75.16            | 73.06            | 4.83  | 73.90                              | 75.14                           | 2.85  |
| White Race                             | 75.55            | 74.27            | 3.07  | 73.71                              | 78.41                           | 11.03 |
| Comorbidities                          |                  |                  |       |                                    |                                 |       |
| Acquired immune deficiency syndrome    | 0.12             | 0.21             | 2.21  | 0.20                               | 0.11                            | 2.18  |
| Chronic blood loss anemia              | 0.22             | 0.14             | 2.03  | 0.16                               | 0.19                            | 0.61  |
| Chronic pulmonary disease              | 29.78            | 28.03            | 3.85  | 28.34                              | 29.44                           | 2.42  |
| Coagulopathy                           | 0.94             | 0.85             | 0.99  | 0.90                               | 1.02                            | 1.16  |
| Congestive heart failure               | 7.8              | 8.51             | 2.59  | 8.11                               | 8.87                            | 2.72  |
| Deficiency Anemias                     | 6.87             | 6.4              | 1.88  | 6.98                               | 6.45                            | 2.12  |
| Depression                             | 29.75            | 25.99            | 8.41  | 27.10                              | 30.46                           | 7.42  |
| Diabetes with chronic complications    | 13.08            | 11.38            | 16.87 | 11.58                              | 13.67                           | 0.47  |
| Diabetes without chronic complications | 49.24            | 40.88            | 5.19  | 44.23                              | 44.00                           | 6.29  |
| Fluid and electrolyte disorders        | 7.09             | 5.99             | 4.43  | 6.43                               | 6.68                            | 1.01  |
| Hypertension                           | N/A              |                  |       | N/A                                |                                 |       |
| Hypothyroidism                         | 17.59            | 17.92            | 0.84  | 17.43                              | 18.44                           | 2.65  |
| Liver disease                          | 15.16            | 13.1             | 5.91  | 11.95                              | 13.00                           | 3.17  |
| Lymphoma                               | 0.07             | 0.14             | 2.22  | 0.14                               | 0.10                            | 1.09  |
| Other neurological disorders           | 5.48             | 5.18             | 1.32  | 5.06                               | 6.39                            | 5.73  |
| Paralysis                              | 0.53             | 0.58             | 0.55  | 0.50                               | 0.56                            | 0.73  |
| Peripheral vascular disease            | 2.06             | 1.88             | 1.33  | 1.91                               | 2.15                            | 1.72  |
| Psychoses                              | 7.31             | 5.65             | 6.73  | 5.84                               | 6.95                            | 4.53  |
| Pulmonary circulation disease          | 1.34             | 0.85             | 4.70  | 1.07                               | 1.23                            | 1.52  |
| Renal failure                          | 7.51             | 7.64             | 0.49  | 7.11                               | 8.52                            | 5.28  |
| Rheumatoid arthritis/collagen vas      | 3.94             | 4.47             | 2.61  | 4.42                               | 4.25                            | 0.82  |
| Solid tumor w/out metastasis           | 0.24             | 0.28             | 0.87  | 0.16                               | 0.37                            | 4.02  |
| Malnutrition                           | 0.43             | 0.29             | 2.48  | 0.40                               | 0.32                            | 1.39  |
| Valvular disease                       | 1.99             | 2.25             | 1.82  | 2.32                               | 2.09                            | 1.57  |

**eTable 5.** Covariate Balance Using Instrumental Variable for Cohort of Patients With Hyperlipidemia Medication Use and Diagnosis at the Time of Surgery

| Characteristic                         | Actual Treatment |                  |       | Prior Year Sleeve Utilization Rate |                                |       |
|----------------------------------------|------------------|------------------|-------|------------------------------------|--------------------------------|-------|
|                                        | Bypass (N=14401) | Sleeve (N=20654) | SD    | 4 <sup>th</sup> qtile (N=8665)     | 1 <sup>st</sup> qtile (N=8599) | SD    |
| Sleeve gastrectomy                     | 0                | 100              | N/A   | 70.85                              | 47.53                          | 48.84 |
| Age (years)                            |                  |                  |       |                                    |                                |       |
| ≤55                                    | 38.9             | 32.78            | 12.78 | 35.61                              | 35.21                          | 0.84  |
| 55-65                                  | 28.28            | 27               | 2.86  | 27.92                              | 28.15                          | 0.53  |
| 66-75                                  | 32.14            | 39.01            | 14.39 | 35.59                              | 35.81                          | 0.45  |
| >75                                    | 0.67             | 1.2              | 5.47  | 0.88                               | 0.83                           | 0.56  |
| Female                                 | 73.38            | 70.7             | 5.97  | 71.46                              | 73.1                           | 3.67  |
| White Race                             | 79.31            | 79.14            | 0.44  | 78.36                              | 82.2                           | 9.65  |
| Comorbidities                          |                  |                  |       |                                    |                                |       |
| Acquired immune deficiency syndrome    | 0.15             | 0.2              | 1.38  | 0.21                               | 0.10                           | 2.61  |
| Chronic blood loss anemia              | 0.19             | 0.15             | 1.04  | 0.15                               | 0.16                           | 0.32  |
| Chronic pulmonary disease              | 29.15            | 27.41            | 3.87  | 27.97                              | 28.92                          | 2.10  |
| Coagulopathy                           | 0.94             | 0.87             | 0.75  | 0.87                               | 1.08                           | 2.2   |
| Congestive heart failure               | 7.94             | 8.74             | 2.88  | 8.68                               | 8.68                           | 0.61  |
| Deficiency Anemias                     | 6.53             | 5.93             | 2.52  | 6.32                               | 6.21                           | 0.47  |
| Depression                             | 29.87            | 25.98            | 8.68  | 27.36                              | 30.03                          | 5.89  |
| Diabetes with chronic complications    | 15.66            | 13.78            | 5.31  | 14.35                              | 15.89                          | 4.30  |
| Diabetes without chronic complications | 54.85            | 46.81            | 16.13 | 50.29                              | 49.37                          | 1.86  |
| Fluid and electrolyte disorders        | 6.8              | 6.05             | 3.04  | 6.47                               | 6.64                           | 0.67  |
| Hypertension                           | 83.63            | 83.46            | 0.46  | 83.38                              | 83.68                          | 0.82  |
| Hypothyroidism                         | 18.72            | 19.24            | 1.33  | 18.30                              | 19.99                          | 4.29  |
| Liver disease                          | 15.33            | 12.75            | 7.41  | 11.91                              | 12.97                          | 3.20  |
| Lymphoma                               | 0.04             | 0.13             | 2.91  | 0.12                               | 0.09                           | 0.69  |
| Other neurological disorders           | 5.53             | 5.31             | 1.01  | 5.38                               | 6.48                           | 4.66  |
| Paralysis                              | 0.52             | 0.65             | 1.74  | 0.58                               | 0.62                           | 0.51  |
| Peripheral vascular disease            | 2.34             | 2.15             | 1.25  | 2.29                               | 2.42                           | 0.88  |
| Psychoses                              | 7.46             | 5.84             | 6.50  | 6.11                               | 7.15                           | 4.21  |
| Pulmonary circulation disease          | 1.29             | 0.85             | 4.27  | 1.12                               | 1.09                           | 0.25  |
| Renal failure                          | 8.3              | 8.56             | 0.93  | 8.07                               | 9.38                           | 4.67  |
| Rheumatoid arthritis/collagen vas      | 3.48             | 3.77             | 1.54  | 3.82                               | 3.84                           | 0.09  |
| Solid tumor w/out metastasis           | 0.26             | 0.28             | 0.46  | 0.17                               | 0.34                           | 3.25  |
| Malnutrition                           | 0.49             | 0.26             | 3.78  | 0.40                               | 0.34                           | 1.10  |
| Valvular disease                       | 1.95             | 2.37             | 2.86  | 2.34                               | 2.16                           | 1.21  |

**eTable 6.** Baseline Characteristics of Patients Who Discontinued All Diabetes, Hypertension, and Hyperlipidemia Medications After Surgery and Among Whom the Incidence of Medication Restart Was Calculated

| Characteristic                         | Diabetes           |                    |                   | Hypertension        |                     |                   | Hyperlipidemia     |                    |                   |
|----------------------------------------|--------------------|--------------------|-------------------|---------------------|---------------------|-------------------|--------------------|--------------------|-------------------|
|                                        | Bypass<br>(N=9898) | Sleeve<br>(N=9701) | P                 | Bypass<br>(N=10101) | Sleeve<br>(N=11510) | P                 | Bypass<br>(N=8959) | Sleeve<br>(N=9587) | P                 |
| Age (mean (SD))                        | 55.8 (11.1)        | 57.0 (11.3)        | <.00 <sub>1</sub> | 54.5 (11.6)         | 55.7 (11.8)         | <.00 <sub>1</sub> | 56.7 (10.8)        | 58.0 (10.9)        | <.00 <sub>1</sub> |
| Female                                 | 7233 (73.1)        | 6916 (71.3)        | 0.005             | 7719 (76.4)         | 8611 (74.8)         | 0.006             | 6739 (75.2)        | 6996 (73.0)        | 0.001             |
| White Race                             | 7521 (76.0)        | 7238 (74.6)        | 0.026             | 7735 (76.6)         | 8646 (75.1)         | 0.043             | 7001 (78.1)        | 7411 (77.3)        | 0.385             |
| Year of Operation                      |                    |                    |                   |                     |                     |                   |                    |                    |                   |
| 2012                                   | 2273 (23.0)        | 77 (0.8)           | <.00 <sub>1</sub> | 2483 (24.6)         | 103 (0.9)           | <.00 <sub>1</sub> | 2170 (24.2)        | 94 (1.0)           | <.00 <sub>1</sub> |
| 2013                                   | 1888 (19.1)        | 1364 (14.1)        |                   | 2040 (20.2)         | 1718 (14.9)         |                   | 1814 (20.3)        | 1525 (15.9)        |                   |
| 2014                                   | 1625 (16.4)        | 1787 (18.4)        |                   | 1773 (17.6)         | 2308 (20.1)         |                   | 1489 (16.6)        | 1948 (20.3)        |                   |
| 2015                                   | 1451 (14.7)        | 1929 (19.9)        |                   | 1452 (14.4)         | 2474 (21.5)         |                   | 1327 (14.8)        | 2048 (21.4)        |                   |
| 2016                                   | 1197 (12.1)        | 1943 (20.0)        |                   | 1195 (11.8)         | 2382 (20.7)         |                   | 1092 (12.2)        | 1906 (19.9)        |                   |
| 2017                                   | 1085 (11.0)        | 1862 (19.2)        |                   | 876 (8.7)           | 1937 (16.8)         |                   | 790 (8.8)          | 1558 (16.3)        |                   |
| 2018                                   | 379 (3.8)          | 739 (7.6)          |                   | 282 (2.8)           | 588 (5.1)           |                   | 277 (3.1)          | 508 (5.3)          |                   |
| Comorbidities                          |                    |                    |                   |                     |                     |                   |                    |                    |                   |
| Acquired immune deficiency syndrome    | –                  | 12 (0.1)           | 0.145             | 12 (0.1)            | 23 (0.2)            | 0.139             | –                  | 16 (0.2)           | 0.218             |
| Chronic blood loss anemia              | 22 (0.2)           | 11 (0.1)           | 0.063             | 28 (0.3)            | 13 (0.1)            | 0.006             | 18 (0.2)           | 12 (0.1)           | 0.200             |
| Chronic pulmonary disease              | 2948 (29.8)        | 2791 (28.8)        | 0.119             | 2971 (29.4)         | 3173 (27.6)         | 0.003             | 2589 (28.9)        | 2545 (26.6)        | <.00 <sub>1</sub> |
| Coagulopathy                           | 111 (1.1)          | 71 (0.7)           | 0.005             | 86 (0.9)            | 94 (0.8)            | 0.779             | 73 (0.8)           | 72 (0.8)           | 0.622             |
| Congestive heart failure               | 770 (7.8)          | 826 (8.5)          | 0.060             | 559 (5.5)           | 583 (5.1)           | 0.124             | 615 (6.9)          | 682 (7.1)          | 0.506             |
| Deficiency Anemias                     | 685 (6.9)          | 616 (6.4)          | 0.109             | 654 (6.5)           | 702 (6.1)           | 0.256             | 570 (6.4)          | 529 (5.5)          | 0.015             |
| Depression                             | 2835 (28.6)        | 2440 (25.2)        | <.00 <sub>1</sub> | 3059 (30.3)         | 3060 (26.6)         | <.00 <sub>1</sub> | 2754 (30.7)        | 2468 (25.7)        | <.00 <sub>1</sub> |
| Diabetes with chronic complications    | N/A                | N/A                | N/A               | 4991 (49.4)         | 4556 (39.6)         | <.00 <sub>1</sub> | 5059 (56.5)        | 4556 (47.5)        | <.00 <sub>1</sub> |
| Diabetes without chronic complications | N/A                | N/A                | N/A               | 974 (9.6)           | 906 (7.9)           | <.00 <sub>1</sub> | 1141 (12.7)        | 1022 (10.7)        | <.00 <sub>1</sub> |
| Fluid and electrolyte disorders        | 676 (6.8)          | 571 (5.9)          | 0.007             | 600 (5.9)           | 614 (5.3)           | 0.054             | 581 (6.5)          | 556 (5.8)          | 0.052             |
| Hypertension                           | 8254 (83.4)        | 7998 (82.5)        | 0.079             | N/A                 | N/A                 | N/A               | 7377 (82.3)        | 7770 (81.2)        | 0.023             |
| Hypothyroidism                         | 1740 (17.6)        | 1734 (17.9)        | 0.589             | 1726 (17.1)         | 1974 (17.2)         | 0.903             | 1628 (18.2)        | 1715 (17.9)        | 0.617             |
| Liver disease                          | 1662 (16.8)        | 1470 (15.2)        | 0.002             | 1515 (15.0)         | 1527 (13.3)         | <.00 <sub>1</sub> | 1363 (15.2)        | 1221 (12.7)        | <.00 <sub>1</sub> |



|                                   |           |           |           |           |           |           |           |           |           |
|-----------------------------------|-----------|-----------|-----------|-----------|-----------|-----------|-----------|-----------|-----------|
| Lymphoma                          | –         | 14 (0.1)  | 0.185     | –         | 19 (0.2)  | 0.011     | –         | 14 (0.2)  | 0.011     |
| Other neurological disorders      | 490 (5.0) | 464 (4.8) | 0.586     | 523 (5.2) | 633 (5.5) | 0.294     | 485 (5.4) | 477 (5.0) | 0.179     |
| Paralysis                         | 51 (0.5)  | 52 (0.5)  | 0.841     | 47 (0.5)  | 57 (0.5)  | 0.751     | 34 (0.4)  | 55 (0.6)  | 0.056     |
| Peripheral vascular disease       | 201 (2.0) | 178 (1.8) | 0.320     | 186 (1.8) | 162 (1.4) | 0.012     | 195 (2.2) | 167 (1.7) | 0.033     |
| Psychoses                         | 787 (8.0) | 644 (6.6) | <.00<br>1 | 879 (8.7) | 836 (7.3) | <.00<br>1 | 701 (7.8) | 620 (6.5) | <.00<br>1 |
| Pulmonary circulation disease     | 149 (1.5) | 100 (1.0) | 0.003     | 140 (1.4) | 96 (0.8)  | <.00<br>1 | 119 (1.3) | 106 (1.1) | 0.166     |
| Renal failure                     | 779 (7.9) | 758 (7.8) | 0.883     | 518 (5.1) | 636 (5.5) | 0.195     | 652 (7.3) | 677 (7.1) | 0.569     |
| Rheumatoid arthritis/collagen vas | 352 (3.6) | 372 (3.8) | 0.302     | 382 (3.8) | 484 (4.2) | 0.114     | 314 (3.5) | 374 (3.9) | 0.154     |
| Solid tumor w/out metastasis      | 24 (0.2)  | 25 (0.3)  | 0.831     | 23 (0.2)  | 27 (0.2)  | 0.916     | 15 (0.2)  | 24 (0.3)  | 0.218     |
| Malnutrition                      | 50 (0.5)  | 29 (0.3)  | 0.023     | 38 (0.4)  | 38 (0.3)  | 0.568     | 44 (0.5)  | 31 (0.3)  | 0.072     |
| Valvular disease                  | 165 (1.7) | 183 (1.9) | 0.245     | 152 (1.5) | 181 (1.6) | 0.687     | 152 (1.7) | 181 (1.9) | 0.327     |

**Legend:** Values represent N (%) unless otherwise specified. Categories with less than 10 patients are censored per data regulations by the Centers for Medicare and Medicaid Services.

**eTable 7.** Adjusted Hazard Ratios Without Use of the Instrumental Variable for Discontinuation of Diabetes, Hypertension, and Hyperlipidemia Medications at 1, 3, and 5 Years After Gastric Bypass Compared to Sleeve Gastrectomy

| Outcome                                 | Adjusted Hazard Ratio (95% CI) |                  |                  |
|-----------------------------------------|--------------------------------|------------------|------------------|
|                                         | 1-year                         | 3-year           | 5-year           |
| Diabetes Medication Discontinuation     | 1.36 (1.31-1.41)               | 1.45 (1.35-1.55) | 1.49 (1.36-1.63) |
| Hypertension Medication Discontinuation | 1.22 (1.17-1.27)               | 1.24 (1.17-1.30) | 1.24 (1.16-1.33) |
| Lipid Medication Discontinuation        | 1.37 (1.34-1.41)               | 1.19 (1.12-1.25) | 1.11 (1.03-1.19) |

**Legend:** Adjusted hazard ratios calculated using Cox hazards models that included treatment, age, sex, race, year of surgery, and comorbidities, which were interacted with time. Medication discontinuation defined as at least a 6-month lapse in claims for a medication refill after the previous medication fill. Outcomes calculated among 30,588 patients with diabetes diagnosis and medication use, 52,081 patients with hypertension diagnosis and medication use, and 35,055 patients with hyperlipidemia diagnosis and medication use.

**eTable 8.** Adjusted Hazard Ratios Without Use of the Instrumental Variable for Restarting Diabetes, Hypertension, and Hyperlipidemia Medications at 1, 3, and 5 Years After Medication Discontinuation Following Gastric Bypass Compared to Sleeve Gastrectomy

| Outcome                         | Adjusted Hazard Ratio (95% CI) |                  |                  |
|---------------------------------|--------------------------------|------------------|------------------|
|                                 | 1-year                         | 3-year           | 5-year           |
| Diabetes Medication Restart     | 0.71 (0.67-0.76)               | 0.78 (0.69-0.88) | 0.81 (0.69-0.95) |
| Hypertension Medication Restart | 0.85 (0.81-0.88)               | 0.94 (0.87-1.01) | 0.98 (0.89-1.08) |
| Lipid Medication Restart        | 0.56 (0.52-0.59)               | 0.49 (0.45-0.54) | 0.46 (0.41-0.52) |

**Legend:** Adjusted hazard ratios calculated using Cox hazards models that included treatment, age, sex, race, year of surgery, comorbidities, which were interacted with time. Medication restart defined as a pharmacy claim for the relevant medication class following discontinuation. Outcomes calculated among 19,599 patients who discontinued all diabetes medications, 21,611 patients who discontinued all hypertension medications, and 18,546 patients who discontinued all hyperlipidemia medications.
